# Supplementary material
Source: PubMed Central journal article supplement (PMC8696690)

## Supplemental Online Content

Butt AA, Dargham SR, Chemaitelly H, et al. Severity of illness in persons infected with the SARS-CoV-2 Delta variant vs Beta variant in Qatar. *JAMA Intern Med*. Published online December 22, 2021. doi:10.1001/jamainternmed.2021.7949

**eTable.** Baseline characteristics before propensity score matching.

**eFigure.** A plot demonstrating the effect of propensity score matching in our study population.

This supplemental material has been provided by the authors to give readers additional information about their work.

eTable. Baseline characteristics before propensity score matching.

|                                  | <b>Delta variant<br/>N=1,427</b>                 | <b>Beta variant<br/>N=5,353</b>                  | <b>P-value</b>      |
|----------------------------------|--------------------------------------------------|--------------------------------------------------|---------------------|
|                                  | <b>% (95% CI) unless<br/>indicated otherwise</b> | <b>% (95% CI) unless<br/>indicated otherwise</b> |                     |
| <b>Age</b>                       |                                                  |                                                  |                     |
| Median (IQR), years              | 32 (25-39)                                       | 34 (26-42)                                       | <0.001 <sup>a</sup> |
| 0-19 years                       | 11.3 (9.7-13.0)                                  | 14.7 (13.8-15.7)                                 | <0.001 <sup>b</sup> |
| 20-39 years                      | 64.8 (62.2-67.2)                                 | 53.7 (52.4-55.1)                                 |                     |
| 40-59 years                      | 21.7 (19.6-24.0)                                 | 28.0 (26.8-29.2)                                 |                     |
| +60 years                        | 2.2 (1.5-3.2)                                    | 3.6 (3.1-4.1)                                    |                     |
| <b>Male sex</b>                  | 79.2 (77.0-81.3)                                 | 68.2 (67.0-69.5)                                 | <0.001 <sup>b</sup> |
| <b>Nationality</b>               |                                                  |                                                  |                     |
| Qatari                           | 12.7 (11.0-14.5)                                 | 14.1 (13.2-15.1)                                 | <0.001 <sup>b</sup> |
| Indian subcontinent <sup>†</sup> | 68.1 (65.6-70.5)                                 | 52.8 (51.5-54.2)                                 |                     |
| Other nationalities <sup>‡</sup> | 19.2 (17.2-21.3)                                 | 33.0 (31.8-34.3)                                 |                     |
| <b>BMI<sup>#</sup></b>           |                                                  |                                                  |                     |
| Median (IQR)                     | 25.8 (21.2-30.3)                                 | 26.4 (21.7-30.4)                                 | 0.13 <sup>a</sup>   |
| Underweight                      | 15.3 (12.1-19.0)                                 | 15.5 (14.1-16.9)                                 | 0.13 <sup>b</sup>   |
| Normal weight                    | 30.8 (26.6-35.3)                                 | 25.7 (24.0-27.4)                                 |                     |
| Overweight                       | 27.9 (23.8-32.3)                                 | 31.5 (29.7-33.3)                                 |                     |
| Obese                            | 25.9 (22.0-30.3)                                 | 27.4 (25.7-29.1)                                 |                     |
| <b>Comorbidities</b>             |                                                  |                                                  |                     |
| Asthma                           | 13.7 (12.0-15.6)                                 | 17.2 (16.2-18.3)                                 | 0.002 <sup>b</sup>  |
| Cancer                           | 0.3 (0.1-0.7)                                    | 0.7 (0.5-0.9)                                    | 0.09 <sup>b</sup>   |
| Chronic kidney disease           | 0.6 (0.3-1.2)                                    | 1.1 (0.8-1.4)                                    | 0.14 <sup>b</sup>   |
| Chronic liver disease            | 0.1 (0.0-0.5)                                    | 0.3 (0.2-0.5)                                    | >0.55 <sup>b</sup>  |
| COPD                             | 5.9 (4.7-7.2)                                    | 6.9 (6.3-7.6)                                    | 0.17 <sup>b</sup>   |
| CAD                              | 0.9 (0.5-1.6)                                    | 2.1 (1.7-2.5)                                    | 0.003 <sup>b</sup>  |
| Diabetes                         | 5.0 (4.0-6.3)                                    | 9.5 (8.7-10.3)                                   | <0.001 <sup>b</sup> |
| Hypertension                     | 4.9 (3.8-6.2)                                    | 9.5 (8.7-10.3)                                   | <0.001 <sup>b</sup> |
| Stroke                           | 0.3 (0.1-0.7)                                    | 0.4 (0.3-0.6)                                    | 0.48 <sup>b</sup>   |
| <b>Comorbidity count</b>         |                                                  |                                                  |                     |
| None                             | 81.5 (79.4-83.5)                                 | 73.1 (71.9-74.3)                                 | <0.001 <sup>b</sup> |
| 1                                | 8.9 (7.5-10.5)                                   | 13.5 (12.6-14.5)                                 |                     |
| 2 or more                        | 9.6 (8.1-11.3)                                   | 13.4 (12.5-14.3)                                 |                     |

<sup>†</sup>Includes India, Pakistan, Bangladesh, Nepal, Sri Lanka, plus Sudan due to large proportions of these nationals being craft and manual workers.

<sup>‡</sup>Other nationalities includes 39 nationalities.

<sup>#</sup>BMI data only available for 451 cases among Delta patients and for 2,639 cases among Beta patients

<sup>a</sup>p-value estimated using the Mann-Whitney test.

<sup>b</sup>p-value estimated using the Chi-square test.

eFigure. A plot demonstrating the effect of propensity score matching in our study population.

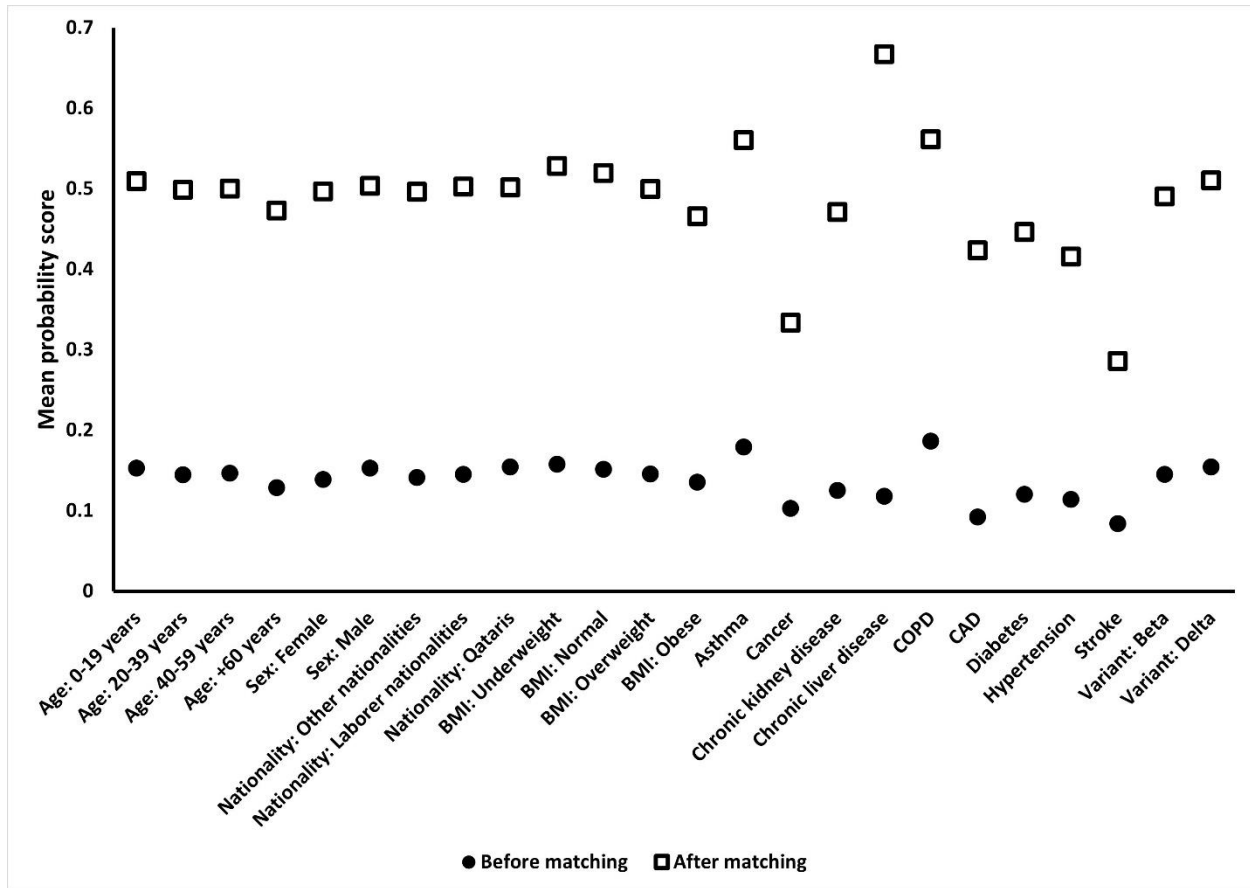

Supplement: jamainternmed-e217949-s001.pdf [file jamainternmed-e217949-s001.pdf]
